# Supplementary material for: Investigation of the dynamic changes in the chemical constituents of Chinese “Laba” garlic during traditional processing
Source: PubMed Central journal article supplement — RSC Adv. 2018 Dec 14;8(73):41872–83. doi: 10.1039/c8ra09657k (PMC9092031; doi:10.1039/c8ra09657k), 2018-12-14
Supplement: RA-008-C8RA09657K-s001.pdf [file RA-008-C8RA09657K-s001.pdf]

**Table S1** The relative concentration of volatile metabolites

| Number | Name                                   | 0 day  | 3 day  | 6 day  | 9 day  | 12 day | 15 day | 21 day | 28 day | 42 day |
|--------|----------------------------------------|--------|--------|--------|--------|--------|--------|--------|--------|--------|
| 1      | Diallyl sulfide                        | 0.847  | 1.486  | 2.565  | 3.486  | 4.054  | 4.633  | 4.469  | 5.938  | 7.017  |
| 2      | Diallyl disulfide                      | 14.511 | 26.385 | 25.593 | 24.954 | 24.162 | 21.928 | 20.725 | 17.752 | 13.817 |
| 3      | Diallyl trisulfide                     | 1.915  | 2.679  | 4.327  | 5.546  | 5.631  | 6.709  | 9.391  | 8.323  | 7.906  |
| 4      | Diallyl tetrasulphide                  | 15.483 | 10.470 | 9.298  | 9.377  | 8.936  | 8.578  | 9.280  | 8.006  | 7.639  |
| 5      | Dimethyl disulfide                     | 0.042  | 0.099  | 0.160  | 0.193  | 0.183  | 0.188  | 0.154  | 0.204  | 0.156  |
| 6      | Allyl methyl sulfide                   | 0.202  | 0.371  | 0.532  | 0.847  | 0.928  | 1.102  | 0.732  | 1.008  | 1.140  |
| 7      | Allyl methyl disulfide                 | 3.399  | 7.716  | 8.595  | 8.502  | 7.829  | 7.523  | 5.702  | 6.593  | 6.577  |
| 8      | Allyl methyl trisulfide                | 2.287  | 2.125  | 3.036  | 3.938  | 4.197  | 4.978  | 5.591  | 6.623  | 7.178  |
| 9      | Allyl thiopropionate                   | 0.018  | 0.070  | 0.060  | 0.021  | 0.009  | 0.008  | 0.002  | 0.003  | 0.002  |
| 10     | Allyl n-propyl sulphide                | 0.007  | 0.006  | 0.009  | 0.013  | 0.016  | 0.018  | 0.016  | 0.024  | 0.029  |
| 11     | 3-Vinyl-1,2-dithiacyclohex-4-ene       | 16.171 | 8.696  | 5.900  | 4.012  | 4.191  | 3.863  | 3.789  | 4.086  | 4.016  |
| 12     | 3-Vinyl-1,2-dithiacyclohex-5-ene       | 0.986  | 0.545  | 0.422  | 0.396  | 0.398  | 0.426  | 0.484  | 0.472  | 0.497  |
| 13     | 1,3-Dithiole-2-thione                  | 0.547  | 0.490  | 0.594  | 0.547  | 0.603  | 0.413  | 0.408  | 0.481  | 0.460  |
| 14     | 3,4-Dimethylthiophene                  | 1.563  | 0.831  | 0.525  | 0.204  | 0.155  | 0.100  | 0.078  | 0.083  | 0.093  |
| 15     | 1,3-Dithiacyclohexane                  | 0.116  | 0.082  | 0.104  | 0.122  | 0.133  | 0.148  | 0.135  | 0.204  | 0.251  |
| 16     | Sulfur dioxide                         | 7.304  | 4.927  | 1.840  | 0.352  | 0.241  | 0.258  | 0.194  | 0.149  | 0.119  |
| 17     | Propyl ethynyl sulfoxide               | 0.000  | 1.315  | 0.975  | 0.856  | 0.844  | 0.758  | 0.632  | 0.722  | 1.002  |
| 18     | Trans-3,5-Diethyl-1,2,4-trithiolane    | 1.193  | 0.657  | 0.466  | 0.328  | 0.319  | 0.216  | 0.136  | 0.168  | 0.288  |
| 19     | Trimethylthiourea                      | 0.177  | 0.079  | 0.042  | 0.021  | 0.021  | 0.016  | 0.021  | 0.039  | 0.059  |
| 20     | Methyl propenyl disulfide              | 0.921  | 1.172  | 1.308  | 1.592  | 1.568  | 1.538  | 1.152  | 1.424  | 1.679  |
| 21     | 2-Ethylidene[1,3]dithiane              | 0.573  | 0.333  | 0.223  | 0.122  | 0.123  | 0.118  | 0.087  | 0.108  | 0.097  |
| 22     | Di(1-Propenyl) sulfide                 | 0.388  | 0.361  | 0.291  | 0.200  | 0.205  | 0.203  | 0.168  | 0.209  | 0.222  |
| 23     | 3-Methoxythiophene                     | 0.287  | 0.260  | 0.201  | 0.154  | 0.159  | 0.144  | 0.124  | 0.147  | 0.168  |
| 24     | S-(3-Hydroxypropyl) thioacetate        | 0.007  | 0.280  | 0.147  | 0.041  | 0.019  | 0.018  | 0.008  | 0.007  | 0.005  |
| 25     | 2-Ethylthiophene                       | 0.270  | 0.143  | 0.100  | 0.035  | 0.037  | 0.026  | 0.024  | 0.026  | 0.026  |
|        | Acetic acid, 2-(thiocarboxy)hydrazide, |        |        |        |        |        |        |        |        |        |
| 26     | O-methyl ester                         | 0.068  | 0.212  | 0.340  | 0.399  | 0.380  | 0.355  | 0.275  | 0.299  | 0.321  |
| 27     | Acetic acid                            | 0.161  | 3.176  | 5.415  | 5.529  | 4.465  | 7.095  | 5.963  | 6.074  | 8.011  |
| 28     | Butanoic acid                          | 0.020  | 0.224  | 0.445  | 0.434  | 0.568  | 0.636  | 0.467  | 0.559  | 0.627  |
| 29     | Benzoic acid                           | 0.201  | 0.983  | 2.609  | 3.279  | 3.729  | 3.822  | 4.078  | 3.920  | 4.112  |
| 30     | Propanoic acid                         | 0.004  | 0.160  | 0.210  | 0.275  | 0.246  | 0.293  | 0.224  | 0.253  | 0.249  |
| 31     | Propyl acetate                         | 0.001  | 0.138  | 0.146  | 0.161  | 0.138  | 0.143  | 0.109  | 0.138  | 0.142  |
| 32     | 2-Butyl acetate                        | 0.000  | 0.189  | 0.171  | 0.168  | 0.167  | 0.170  | 0.114  | 0.160  | 0.159  |
| 33     | Butyric acid, ethyl ester              | 0.000  | 0.151  | 0.150  | 0.169  | 0.171  | 0.182  | 0.126  | 0.173  | 0.196  |
| 34     | Propionic acid, propyl ester           | 0.000  | 0.016  | 0.019  | 0.019  | 0.020  | 0.019  | 0.013  | 0.018  | 0.020  |
| 35     | Pentanoic acid, ethyl ester            | 0.075  | 0.048  | 0.061  | 0.068  | 0.064  | 0.068  | 0.044  | 0.058  | 0.062  |
| 36     | Hexanoic acid, ethyl ester             | 0.004  | 0.015  | 0.032  | 0.036  | 0.034  | 0.034  | 0.022  | 0.028  | 0.028  |
| 37     | Benzoic acid, ethyl ester              | 0.000  | 0.806  | 1.304  | 1.213  | 1.145  | 1.139  | 0.853  | 1.001  | 1.011  |
| 38     | Propene                                | 15.699 | 11.542 | 11.694 | 10.676 | 11.785 | 10.292 | 11.357 | 11.307 | 11.407 |
| 39     | 2-Propen-1-ol                          | 0.986  | 0.726  | 0.386  | 0.085  | 0.073  | 0.065  | 0.043  | 0.066  | 0.046  |
| 40     | Acetaldehyde                           | 0.461  | 0.234  | 0.359  | 0.546  | 0.415  | 0.354  | 0.279  | 0.313  | 0.339  |
| 41     | 2-Butanol                              | 0.013  | 0.326  | 0.397  | 0.518  | 0.456  | 0.497  | 0.358  | 0.495  | 0.543  |
| 42     | 1-Butanol, 3-methyl-, acetate          | 1.398  | 0.495  | 0.237  | 0.226  | 0.275  | 0.261  | 0.227  | 0.209  | 0.200  |
| 43     | Ethyl trans-2-pentenoate               | 0.113  | 0.321  | 0.311  | 0.288  | 0.269  | 0.282  | 0.189  | 0.256  | 0.270  |
| 44     | (Z)-Benzaldoxime                       | 11.583 | 8.662  | 8.400  | 10.050 | 10.639 | 10.378 | 11.759 | 11.875 | 11.817 |

Values are means of triplicate relative peak areas to that of the total peak area of all components in the sample.

**Table S2** The relative concentration of primary metabolites

| Number | Name              | 0 day | 3 day | 6 day | 9 day | 12 day | 15 day | 21 day | 28 day | 42 day |
|--------|-------------------|-------|-------|-------|-------|--------|--------|--------|--------|--------|
| 1      | Lactic acid       | 0.060 | 0.171 | 0.306 | 0.511 | 0.722  | 0.420  | 0.539  | 0.520  | 0.346  |
| 2      | Butanedioic acid  | 0.004 | 0.020 | 0.038 | 0.067 | 0.099  | 0.073  | 0.117  | 0.125  | 0.095  |
| 3      | DL-Malic acid     | 2.410 | 1.448 | 1.464 | 1.315 | 1.656  | 1.237  | 1.374  | 1.268  | 1.080  |
| 4      | n.-Octanoic acid  | 2.037 | 1.214 | 0.790 | 0.433 | 0.447  | 0.181  | 0.219  | 0.195  | 0.276  |
| 5      | Ribonic acid      | 0.476 | 0.297 | 0.217 | 0.185 | 0.151  | 0.127  | 0.139  | 0.133  | 0.120  |
| 6      | Isocitric acid    | 0.412 | 0.403 | 0.580 | 0.682 | 0.685  | 0.509  | 0.547  | 0.488  | 0.531  |
| 7      | L-Alanine         | 0.308 | 0.816 | 0.626 | 0.595 | 0.535  | 0.272  | 0.338  | 0.284  | 0.191  |
| 8      | L-Leucine         | 0.086 | 0.156 | 0.221 | 0.295 | 0.258  | 0.121  | 0.145  | 0.141  | 0.103  |
| 9      | L-Valine          | 0.042 | 0.046 | 0.051 | 0.045 | 0.045  | 0.029  | 0.039  | 0.036  | 0.035  |
| 10     | L-Isoleucine      | 0.053 | 0.066 | 0.080 | 0.077 | 0.082  | 0.053  | 0.079  | 0.076  | 0.078  |
| 11     | Glycine           | 0.008 | 0.034 | 0.038 | 0.037 | 0.038  | 0.029  | 0.035  | 0.036  | 0.037  |
| 12     | Serine            | 0.300 | 0.064 | 0.064 | 0.040 | 0.060  | 0.031  | 0.051  | 0.047  | 0.037  |
| 13     | L-Threonine       | 0.092 | 0.071 | 0.067 | 0.052 | 0.053  | 0.029  | 0.041  | 0.039  | 0.035  |
| 14     | L-Proline         | 1.058 | 0.650 | 0.808 | 0.882 | 1.015  | 0.638  | 0.929  | 1.070  | 1.214  |
| 15     | L-Cysteine        | 0.241 | 0.167 | 0.080 | 0.044 | 0.042  | 0.016  | 0.019  | 0.016  | 0.021  |
| 16     | Ornithine         | 0.294 | 0.367 | 0.360 | 0.284 | 0.230  | 0.114  | 0.178  | 0.163  | 0.136  |
| 17     | Glutamic acid     | 0.200 | 0.145 | 0.218 | 0.234 | 0.224  | 0.153  | 0.216  | 0.200  | 0.189  |
| 18     | DL-Phenylalanine  | 0.177 | 0.180 | 0.232 | 0.249 | 0.257  | 0.179  | 0.245  | 0.248  | 0.266  |
| 19     | L-Asparagine      | 0.177 | 0.079 | 0.106 | 0.054 | 0.047  | 0.021  | 0.025  | 0.022  | 0.024  |
| 20     | Lanthionine       | 1.184 | 0.643 | 0.331 | 0.153 | 0.133  | 0.050  | 0.058  | 0.047  | 0.061  |
| 21     | L-Methionine      | 0.148 | 0.115 | 0.083 | 0.059 | 0.053  | 0.031  | 0.038  | 0.034  | 0.043  |
| 22     | L-Tyrosine        | 1.603 | 0.952 | 0.557 | 0.270 | 0.257  | 0.117  | 0.141  | 0.113  | 0.153  |
| 23     | L-Lysine          | 0.085 | 0.122 | 0.164 | 0.175 | 0.192  | 0.131  | 0.192  | 0.185  | 0.179  |
| 24     | L-Homoserine      | 0.462 | 0.253 | 0.125 | 0.059 | 0.053  | 0.025  | 0.028  | 0.025  | 0.036  |
| 25     | N-Acetylglutamine | 0.323 | 0.288 | 0.227 | 0.183 | 0.130  | 0.104  | 0.135  | 0.122  | 0.097  |
| 26     | Erythritol        | 0.025 | 0.032 | 0.054 | 0.097 | 0.160  | 0.110  | 0.181  | 0.200  | 0.150  |
| 27     | Pentitol          | 0.003 | 0.057 | 0.099 | 0.135 | 0.088  | 0.099  | 0.072  | 0.071  | 0.100  |
| 28     | Xylulose          | 0.016 | 0.019 | 0.013 | 0.011 | 0.007  | 0.007  | 0.007  | 0.007  | 0.006  |
| 29     | Arabinose         | 0.001 | 0.015 | 0.037 | 0.054 | 0.043  | 0.038  | 0.044  | 0.042  | 0.043  |
| 30     | D-Ribose          | 0.024 | 0.021 | 0.022 | 0.027 | 0.026  | 0.018  | 0.024  | 0.028  | 0.026  |
| 31     | D-Fructose        | 0.262 | 3.005 | 3.393 | 3.108 | 3.417  | 4.068  | 3.566  | 3.510  | 3.743  |
| 32     | D-Glucose         | 0.048 | 0.679 | 1.698 | 2.375 | 2.364  | 2.706  | 2.586  | 2.894  | 2.914  |
| 33     | Sucrose           | 6.557 | 5.091 | 5.207 | 4.635 | 5.050  | 5.201  | 5.065  | 5.924  | 5.559  |
| 34     | Myo-Inositol      | 1.533 | 1.562 | 1.505 | 1.600 | 1.443  | 1.457  | 1.578  | 1.592  | 1.712  |
| 35     | 1,3 Propanediol   | 0.000 | 0.632 | 1.454 | 2.354 | 3.096  | 1.918  | 2.361  | 2.301  | 1.588  |
| 36     | Succinylacetone   | 0.131 | 0.087 | 0.087 | 0.059 | 0.049  | 0.029  | 0.034  | 0.032  | 0.033  |

Values are means of triplicate relative peak areas to that of the internal standard.

**Table S3** The detailed information of 15 phenolic compounds

| Number | Name                     | Quant ion (m/z) | Collision energy (eV) | Declustering potential (V) | Regression equation | Correlation coefficient (r) | Linear range (ng/mL) | LOD <sup>a</sup> (ng/mL) | LOQ <sup>b</sup> (ng/mL) |
|--------|--------------------------|-----------------|-----------------------|----------------------------|---------------------|-----------------------------|----------------------|--------------------------|--------------------------|
| 1      | Protocatechuic acid      | 109.10          | -13.00                | -23.00                     | y=8030x-18100       | 0.9942                      | 5-500                | 1.5                      | 5.0                      |
| 2      | (+)-Catechin             | 122.90          | -34.00                | -10.00                     | y=3100x+638         | 0.9879                      | 1-100                | 0.3                      | 1.0                      |
| 3      | <i>p</i> -Coumaric acid  | 64.80           | -51.00                | -17.00                     | y=1510x-2400        | 0.9987                      | 1-100                | 0.3                      | 1.0                      |
| 4      | Caffeic acid             | 134.90          | -21.00                | -38.00                     | y=91400+4720000     | 0.9985                      | 50-2000              | 15.0                     | 50.0                     |
| 5      | <i>p</i> -Hydroxybenzoic | 92.90           | -17.00                | -20.00                     | y=2830+108000       | 0.9989                      | 10-1000              | 3.0                      | 10.0                     |
| 6      | Vanillic acid            | 107.90          | -22.00                | -30.00                     | y=7320+6650         | 0.9990                      | 2-500                | 0.6                      | 2.0                      |
| 7      | Quercitrin               | 254.80          | -43.00                | -29.00                     | y=1590x-223         | 0.9978                      | 2-100                | 0.6                      | 2.0                      |
| 8      | Ferulic acid             | 134.00          | -19.00                | -17.00                     | y=1430x+8520        | 0.9984                      | 50-1000              | 15.0                     | 50.0                     |
| 9      | Sinapic acid             | 163.90          | -16.00                | -20.00                     | y=1720x+41800       | 0.9966                      | 10-1000              | 3.0                      | 10.0                     |
| 10     | Myricetin                | 178.90          | -29.00                | -33.00                     | y=3000x-4970        | 0.9983                      | 2-100                | 0.6                      | 2.0                      |
| 11     | Resveratrol              | 143.00          | -37.00                | -23.00                     | y=2560x-1170        | 0.9974                      | 2-100                | 0.6                      | 2.0                      |
| 12     | Quercetin                | 150.90          | -30.00                | -7.00                      | y=94100x-166000     | 0.9997                      | 2-200                | 0.6                      | 2.0                      |
| 13     | Apigenin                 | 117.00          | -36.00                | -15.00                     | y=9940x-23800       | 0.9966                      | 2-100                | 0.6                      | 2.0                      |
| 14     | Kaempferol               | 187.00          | -37.00                | -16.00                     | y=16900x+10200      | 0.9998                      | 1-100                | 0.3                      | 1.0                      |
| 15     | Isorhamnetin             | 300.00          | -25.00                | -68.00                     | y=58200x-135000     | 0.9969                      | 2-100                | 0.6                      | 2.0                      |

<sup>a</sup> LOD is limit of detection

<sup>b</sup> LOQ is limit of quantation

**Table S4** The concentration of 15 phenolic compounds (mg/kg of lyophilized sample, n=3)

| Number | Name                     | 0day  | 3day   | 6day   | 9day   | 12day  | 15day  | 21day  | 28day  | 42day  |
|--------|--------------------------|-------|--------|--------|--------|--------|--------|--------|--------|--------|
| 1      | Protocatechuic acid      | 0.175 | 0.189  | 0.161  | 0.172  | 0.208  | 0.245  | 0.297  | 0.314  | 0.413  |
| 2      | (+)-Catechin             | 0.648 | 0.462  | 0.273  | 0.556  | 0.784  | 0.700  | 0.406  | 0.523  | 1.184  |
| 3      | <i>p</i> -Coumaric acid  | 0.040 | 0.061  | 0.084  | 0.111  | 0.119  | 0.125  | 0.138  | 0.356  | 0.383  |
| 4      | Caffeic acid             | 1.815 | 20.134 | 28.630 | 26.343 | 29.727 | 34.300 | 28.490 | 19.553 | 19.633 |
| 5      | <i>p</i> -Hydroxybenzoic | 1.841 | 1.112  | 2.891  | 3.591  | 5.728  | 6.351  | 8.675  | 6.727  | 8.237  |
| 6      | Vanillic acid            | 0.086 | 0.206  | 0.871  | 1.266  | 1.649  | 2.060  | 1.995  | 3.162  | 3.302  |
| 7      | Quercitrin               | 0.746 | 1.135  | 0.893  | 0.675  | 0.441  | 0.329  | 0.526  | 0.834  | 0.511  |
| 8      | Ferulic acid             | 0.626 | 5.840  | 7.224  | 10.096 | 17.953 | 9.224  | 10.537 | 17.850 | 24.710 |
| 9      | Sinapic acid             | 0.765 | 2.266  | 7.413  | 8.139  | 12.490 | 6.963  | 6.067  | 9.529  | 7.644  |
| 10     | Myricetin                | 0.039 | 0.382  | 0.214  | 0.370  | 0.200  | 0.200  | 0.298  | 0.828  | 0.832  |
| 11     | Resveratrol              | 0.023 | 0.022  | 0.029  | 0.023  | 0.035  | 0.023  | 0.026  | 0.029  | 0.034  |
| 12     | Quercetin                | 0.027 | 0.114  | 0.103  | 0.181  | 0.090  | 0.120  | 0.146  | 0.365  | 0.553  |
| 13     | Apigenin                 | 0.037 | 0.037  | 0.037  | 0.038  | 0.041  | 0.041  | 0.041  | 0.047  | 0.046  |
| 14     | Kaempferol               | 0.010 | 0.052  | 0.041  | 0.068  | 0.053  | 0.064  | 0.084  | 0.195  | 0.286  |
| 15     | Isorhamnetin             | 0.034 | 0.247  | 0.297  | 0.378  | 0.241  | 0.279  | 0.384  | 1.040  | 0.961  |

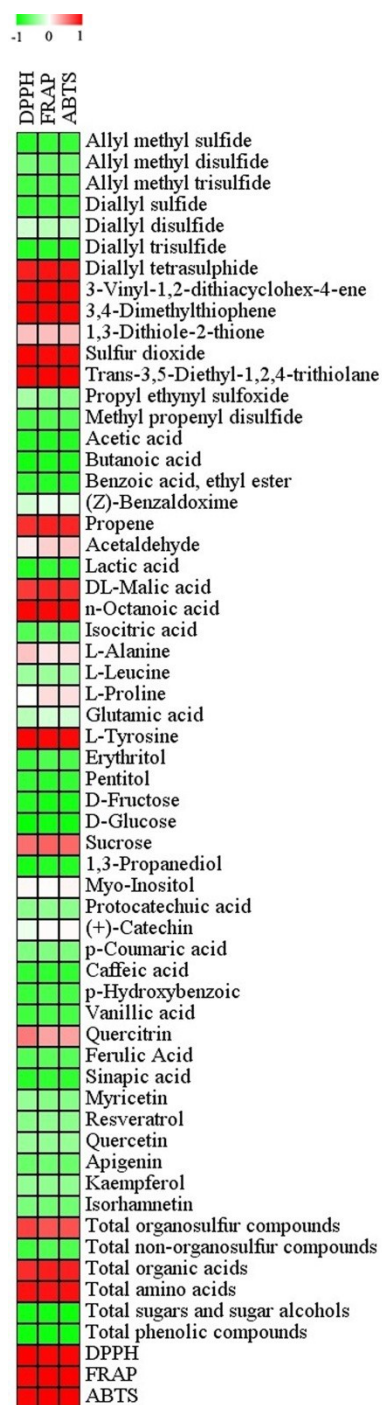

**Fig. S1** A correlation map between metabolites and antioxidant activity (DPPH, ABTS and FRAP). Each square indicates the Pearson's correlation coefficient values ( $r$ ). The red color represents a positive ( $0 < r < 1$ ) correlation and the green color represents a negative ( $-1 < r < 0$ ) correlation.
